# Supplementary material
Source: bioRxiv or medRxiv preprint supplement (https://www.biorxiv.org/highwire/filestream/69195/field_highwire_adjunct_files/1/226845-2.pdf)
Supplement: Supplementary file [file 226845-2.pdf]

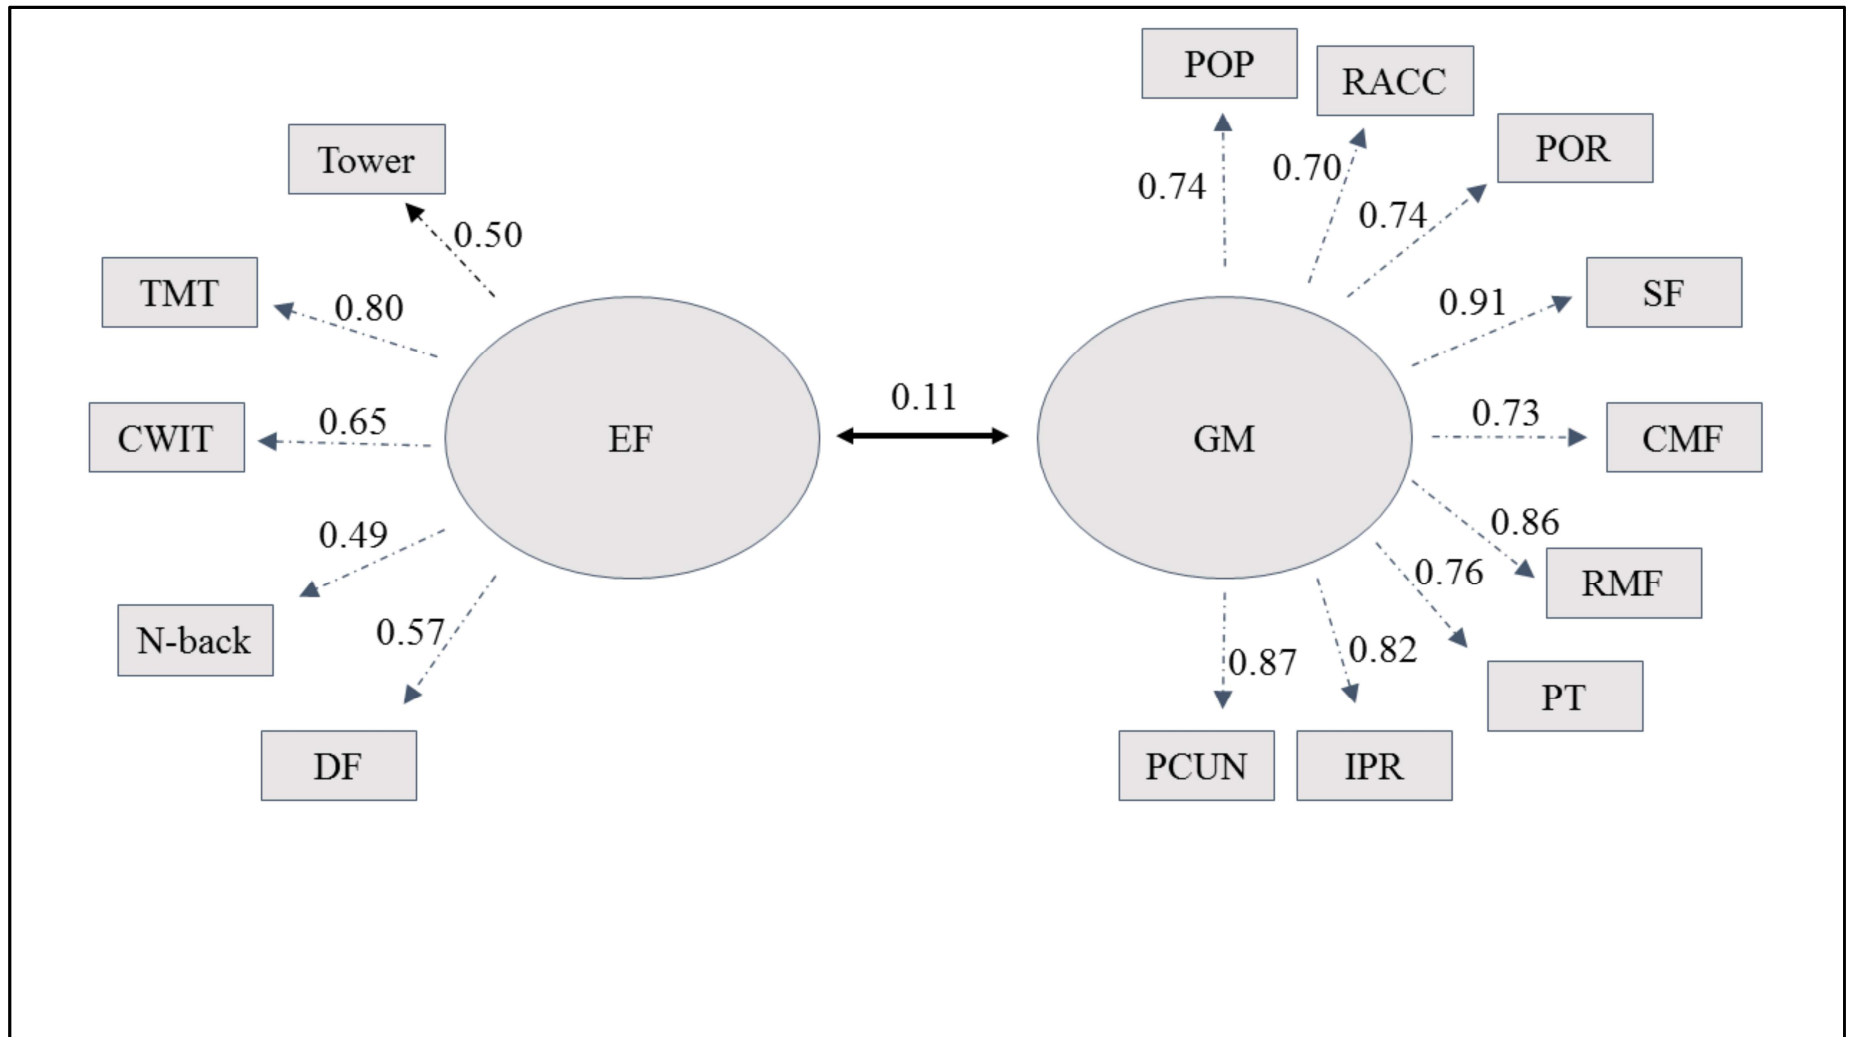

*Supplementary Figure 1.* Measurement model showing the bidirectional relationships between EF and GM. Dashed lines indicate factor loadings to latent variables. Abbreviations are as follows: rostral anterior cingulate (RACC), superior frontal (SF), rostral middle frontal (RMF), caudal middle frontal (CMF), pars opercularis (POP), pars triangularis (PT), pars orbitalis (POR), precuneus (PCUN) and inferior parietal (IP) regional volumes.
